# Supplementary material for: Highly conductive, conformable ionic laser-induced graphene electrodes for flexible iontronic devices
Source: PubMed Central journal article supplement (PMC10897153; doi:10.1038/s41598-024-55082-w), 2024-02-26
Supplement: 41598_2024_55082_MOESM1_ESM.pdf [file 41598_2024_55082_MOESM1_ESM.pdf]

## Supplementary Information

### Highly Conductive, Conformable Ionic Laser-induced Graphene Electrodes for Flexible Iontronic Devices

So Young Kim<sup>1,5+</sup>, Ji Hong Kim<sup>1,+</sup>, Kyeong Nam Kim<sup>2,+</sup>, Hayoung Oh<sup>1</sup>,  
Sung Myung<sup>3,\*</sup>, and Do Hwan Kim<sup>1,4,5\*</sup>

<sup>1</sup>Department of Chemical Engineering, Hanyang University, Seoul, 04763, Republic of Korea

<sup>2</sup>Division of Energy Technology, DGIST, Daegu, 42988, Republic of Korea

<sup>3</sup>Thin Film Material Research Center, Korea Research Institute of Chemical Technology (KRICT), Daejeon, 34114, Republic of Korea

<sup>4</sup>Institute of Nano Science and Technology, Hanyang University, Seoul 04763, Republic of Korea

<sup>5</sup>Clean-Energy Research Institute, Hanyang University, Seoul 04763, Republic of Korea

\*Corresponding authors: Do Hwan Kim ([dhkim76@hanyang.ac.kr](mailto:dhkim76@hanyang.ac.kr)); Sung Myung ([msung@kRICT.ac.kr](mailto:msung@kRICT.ac.kr)).

+These authors contributed equally to this work

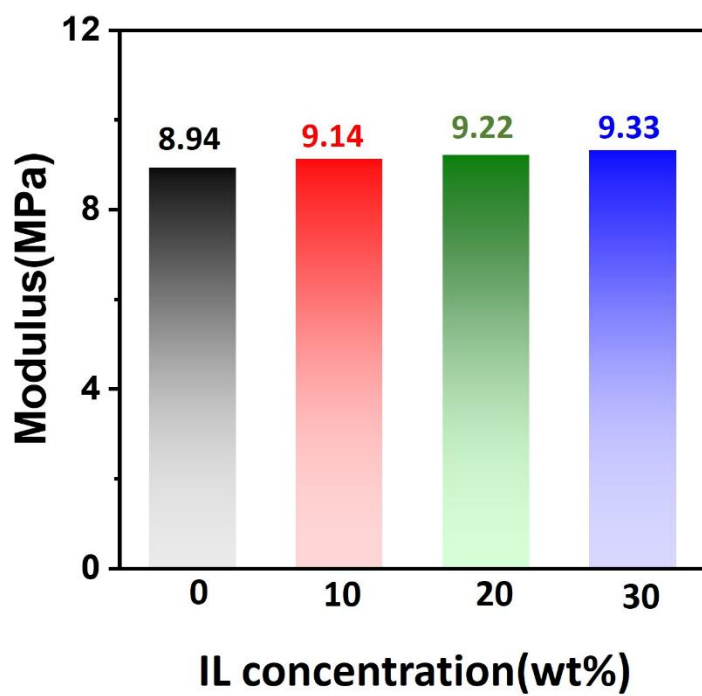

**Supplementary Figure S1. Mechanical properties of PI ion gel with different ILs contents (0-30wt%).**

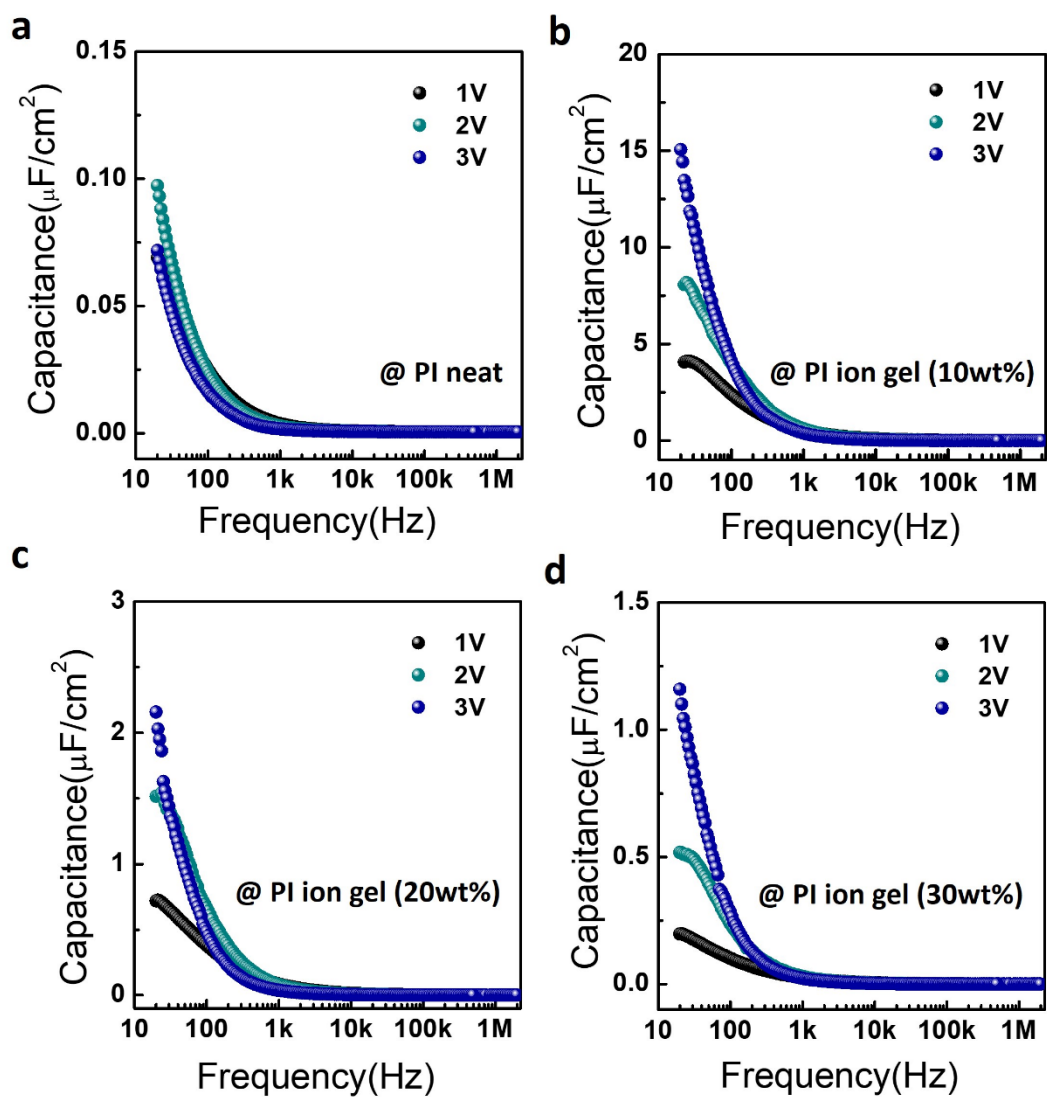

**Supplementary Figure S2. Capacitance-frequency of PI ion with varying concentrations of ILs (0-30 wt%).** (a) PI neat film (b) PI ion gel with 10wt% of ILs (c) PI ion gel with 20wt% of ILs (d) PI ion gel with 30wt% of ILs .

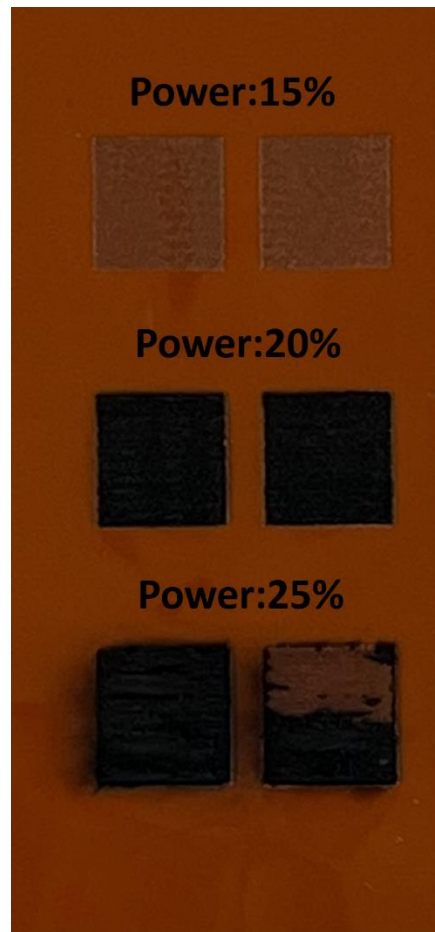

**Supplementary Figure S3. Photograph of i-LIG with varying CO<sub>2</sub> laser power (15%, 20%, 25%).**

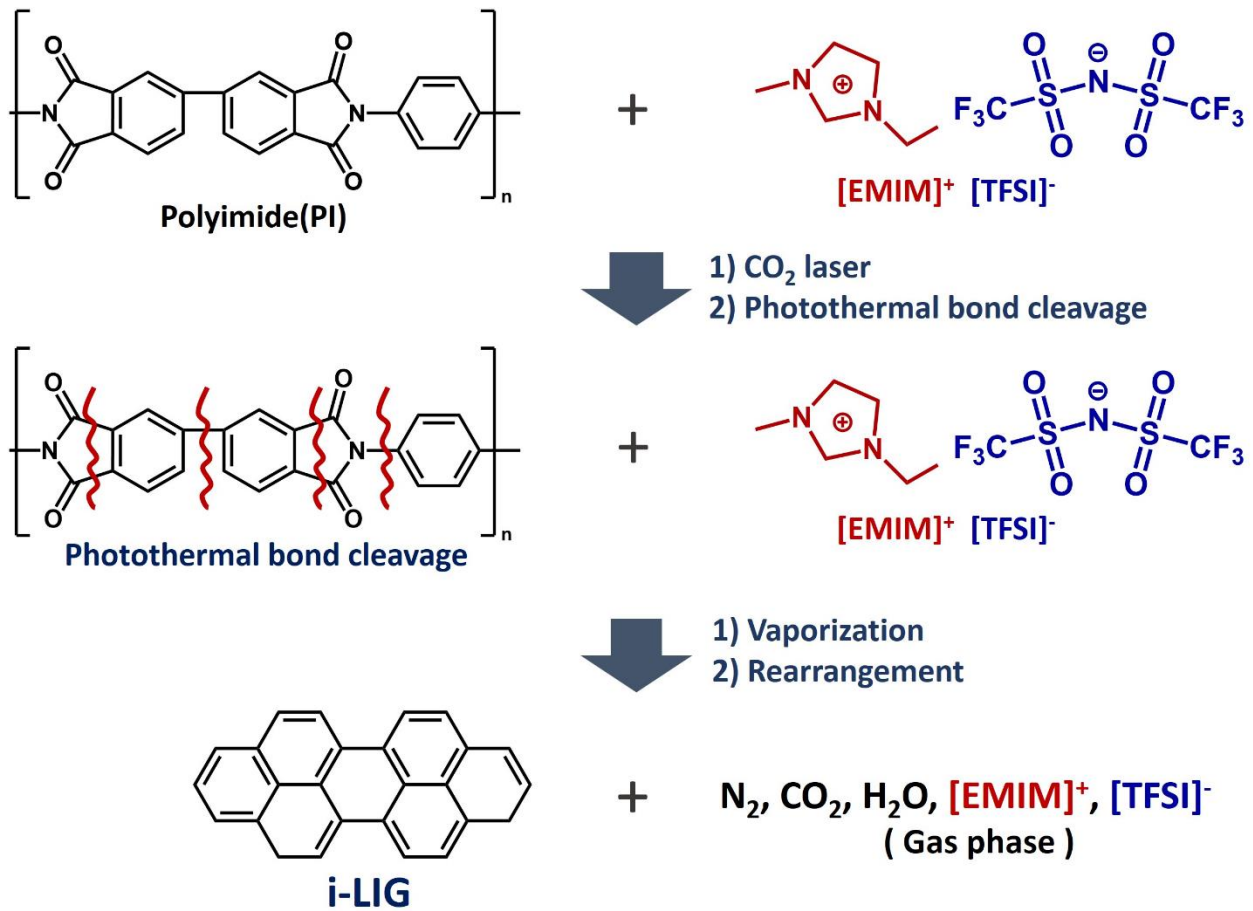

Supplementary Figure S4. Mechanism schematic of conversion LIG from PI ion gel.

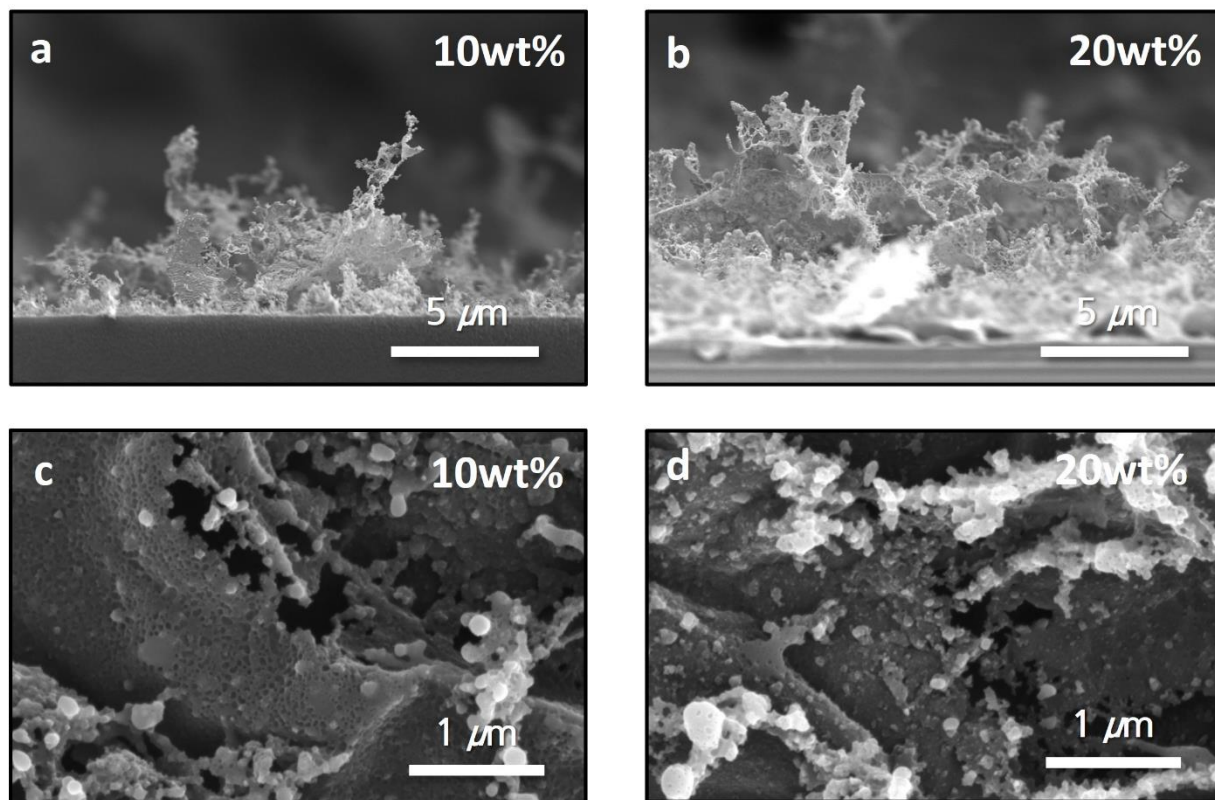

**Supplementary Figure S5. Morphological analysis of i-LIGs.** Schematic representations  
Cross-sectional SEM images of (a) i-LIG with 10 wt% of ILs and (b) i-LIG with 20 wt% of ILs.  
Top view SEM images of (c) i-LIG with 10 wt% of ILs and (d) i-LIG with 20 wt% of ILs.

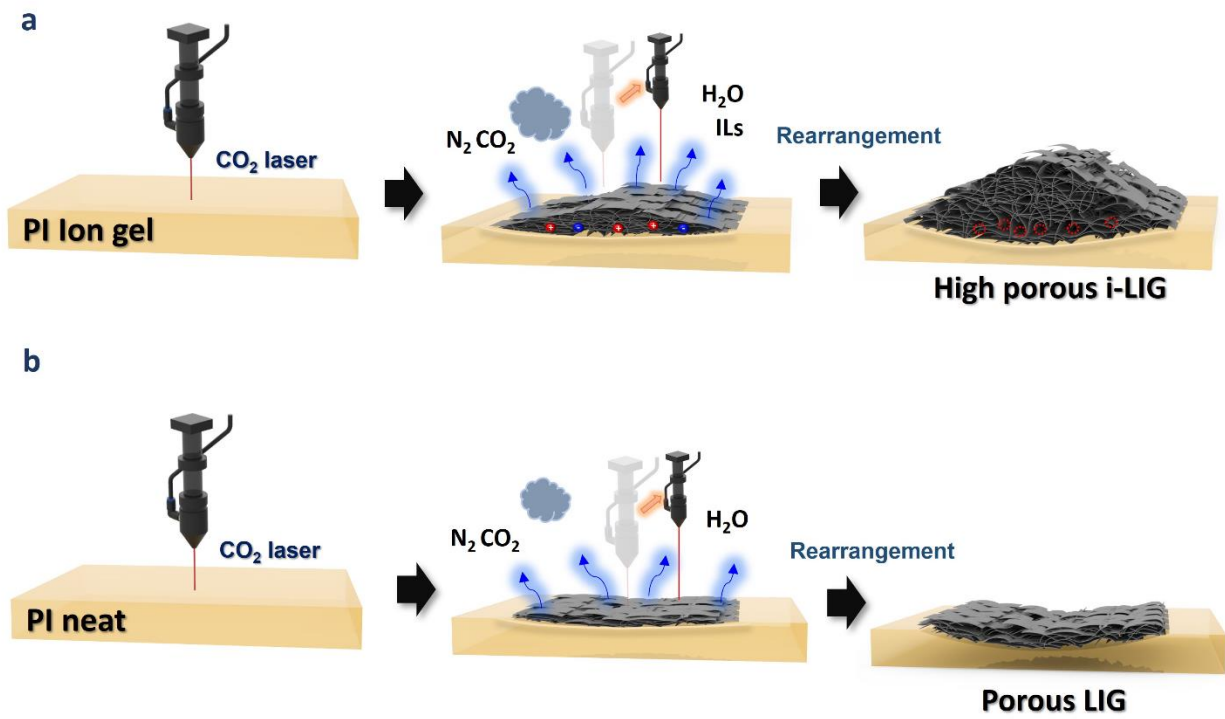

**Supplementary Figure S6. Mechanism schematic of producing LIG mechanism from (a) PI ion gel and (b) PI neat**
